# Supplementary material for: Nanocrystalline N-doped ceria porous thin films as efficient visible-active photocatalysts
Source: Royal Society of Chemistry journal article supplement (doi:10.1039/c2jm15230d), 2012-01-01
Supplement: c2jm15230d.pdf [file c2jm15230d.pdf]

## SUPPLEMENTARY MATERIAL

### Nanocrystalline N-doped Ceria Porous Thin Films as Efficient Visible-Active Photocatalysts

A. Belén Jorge, Yoshiaki Sakatani, Cédric Boissière, Christel Laberty-Roberts, Guillaume Sauthier, Jordi Fraxedas, Clément Sanchez, and Amparo Fuertes

#### Pore size distribution of samples Ce-550-670 and Ce-600-670

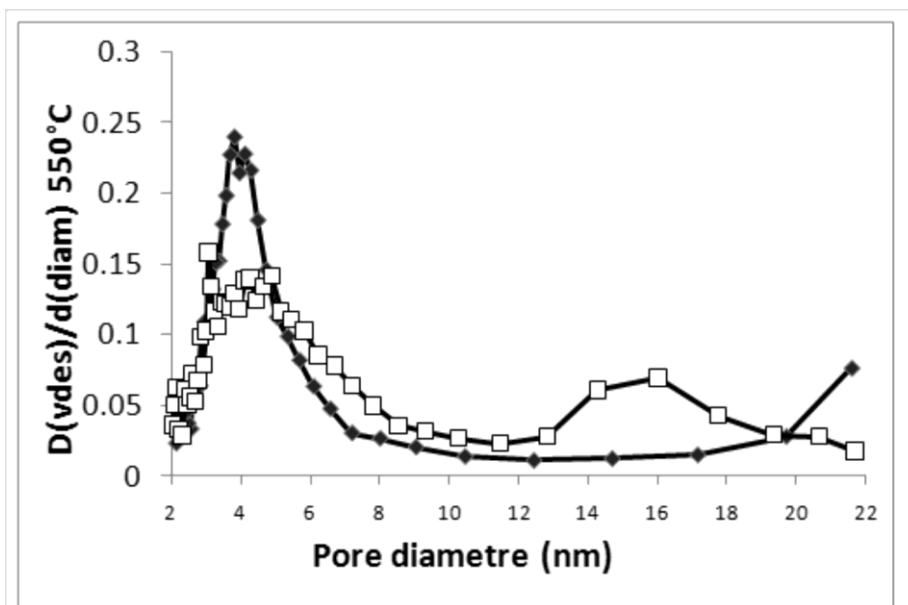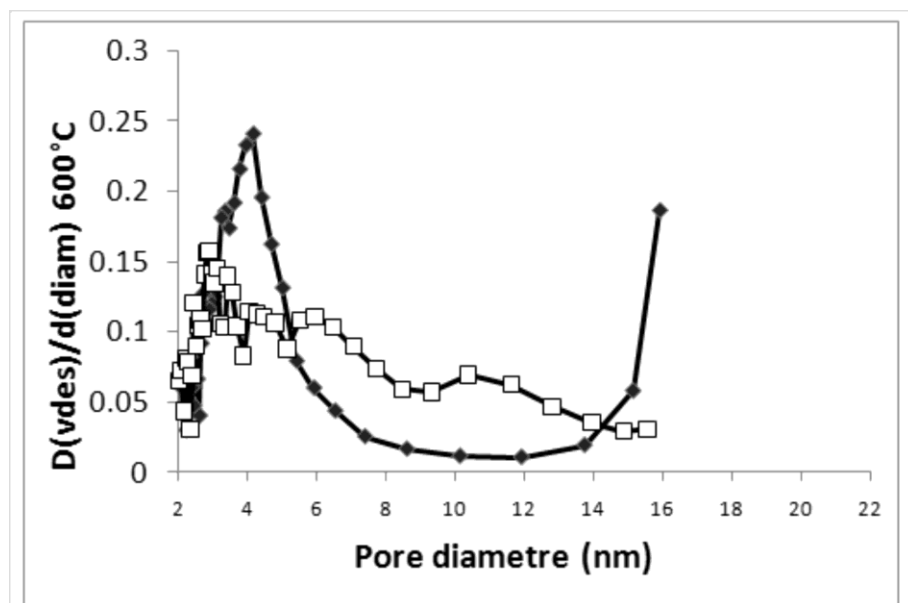

Pore size distribution obtained from adsorption (squares) and desorption (diamonds) curves of the water adsorption isotherms. These pore size have been calculated assuming an ellipsoidal pore shape with an aspect ratio of 2.73. The reported Pore size values are those of the small axis of the ellipses. As the surface of nitrated films are poorly hydrophilic, these values are given with an imprecision of about 30%.
